# Supplementary material for: Novel Polyethers from Screening Actinoallomurus spp
Source: PubMed Central journal article supplement (PMC6023020; doi:10.3390/antibiotics7020047), 2018-06-14
Supplement: antibiotics-07-00047-s001.pdf [file antibiotics-07-00047-s001.pdf]

# Supplementary Material

## Novel polyethers from screening *Actinoallomurus* spp.

Marianna Iorio, Arianna Tocchetti, Joao Carlos Santos Cruz, Giancarlo Del Gatto, Cristina Brunati, Sonia Ilaria Maffioli, Margherita Sosio, Stefano Donadio

**Table S1.** The  $\alpha$ -823 congeners detected in the extract from *Actinoallomurus* sp. ID145823.

| Congener        | $m/z$ [M+Na] <sup>+</sup> | RT (min) | $\Delta m/z$ | Molecular formula                                  | calc. $m/z$ | found $m/z$ |
|-----------------|---------------------------|----------|--------------|----------------------------------------------------|-------------|-------------|
| $\alpha$ -823 A | 937                       | 8.1      | ---          | C <sub>48</sub> H <sub>82</sub> O <sub>16</sub> Na | 937.5495    | 937.5510    |
| $\alpha$ -823 B | 893                       | 7.3      | -44          | C <sub>47</sub> H <sub>82</sub> O <sub>14</sub> Na | 893.5597    | 893.5589    |
| $\alpha$ -823 C | 937                       | 7.0      | ---          | C <sub>48</sub> H <sub>82</sub> O <sub>16</sub> Na | 937.5495    | 937.5510    |
| $\alpha$ -823 D | 923                       | 6.1      | -14          | C <sub>47</sub> H <sub>80</sub> O <sub>16</sub> Na | 923.5339    | 923.5376    |
| $\alpha$ -823 E | 951                       | 5.5      | +14          | C <sub>49</sub> H <sub>84</sub> O <sub>16</sub> Na | 951.5652    | 951.5611    |
| $\alpha$ -823 F | 937                       | 4.6      | ---          | C <sub>48</sub> H <sub>82</sub> O <sub>16</sub> Na | 937.5495    | 937.5510    |

**Table S2.** <sup>1</sup>H and <sup>13</sup>C NMR data for α-823 in CDCl<sub>3</sub>.

| Position | δ <sub>H</sub> , (J in Hz) | δ <sub>C</sub> , type |
|----------|----------------------------|-----------------------|
| 1        |                            | 180.3, C              |
| 2        | 2.18 (*) - 2.54, d (12.6)  | 44.7, CH <sub>2</sub> |
| 3        |                            | 97.9, C               |
| 4        | 1.51 (*)                   | 44.7, CH              |
| Me (4)   | 1.04, d (6.6)              | 12.5, CH <sub>3</sub> |
| 5        | 3.42, d (10.2)             | 84.4, CH              |
| OMe (5)  | 3.57, s                    | 60.5, CH <sub>3</sub> |
| 6        |                            | 78.6, C               |
| OMe (6)  | 3.38, s                    | 50.0, CH <sub>3</sub> |
| Me (6)   | 1.16, s                    | 11.4, CH <sub>3</sub> |
| 7        | 3.90, m                    | 66.0, CH              |
| 8        | 1.58 (**)                  | 32.6, CH <sub>2</sub> |
| 9        | 4.08, m                    | 60.9, CH              |
| 10       | 1.16 (*) - 2.21 (*)        | 31.3, CH <sub>2</sub> |
| 11       | 3.39                       | 79.5, CH              |
| OMe (11) | 3.53, s                    | 59.0, CH <sub>3</sub> |
| 12       | 1.84                       | 33.6, CH              |
| Me (12)  | 0.96, d (7.5)              | 12.5, CH <sub>3</sub> |
| 13       |                            | 108.2, C              |
| 14       | 2.47, m                    | 39.0, CH              |
| Me (14)  | 0.94, d (6.2)              | 12.1, CH <sub>3</sub> |
| 15       | 1.47 (*) - 2.38 (*)        | 38.7, CH <sub>2</sub> |
| 16       |                            | 82.7, C               |
| Me (16)  | 1.49, s                    | 27.9, CH <sub>3</sub> |
| 17       | 3.69, d (6.3)              | 87.4, CH              |
| 18       | 4.42, m                    | 74.1, CH              |
| 19       | 1.47 (*) - 2.19 (*)        | 36.6, CH <sub>2</sub> |
| 20       |                            | 83.9, C               |
| Me (20)  | 1.24, s                    | 22.0, CH <sub>3</sub> |
| 21       | 4.24, dd (5.3, 11.0)       | 83.4, CH              |
| 22       | 1.88 (*) - 2.03 (m)        | 29.7, CH <sub>2</sub> |
| 23       | 1.81 (*) - 2.21 (*)        | 24.2, CH <sub>2</sub> |
| 24       | 4.32, m                    | 80.8, CH              |
| 25       | 3.86, m                    | 74.8, CH              |
| 26       | 1.36, m                    | 33.0, CH              |
| Me (26)  | 0.84, d (7.1)              | 17.4, CH <sub>3</sub> |
| 27       | 1.47, m                    | 36.0, CH <sub>2</sub> |
| 28       | 1.53 (**)                  | 39.6, CH              |
| Me (28)  | 0.93, d (6.2)              | 16.9, CH <sub>3</sub> |
| 29       |                            | 96.5, C               |
| Me (29)  | 1.33, s                    | 26.5, CH <sub>3</sub> |
| 1'       | 4.44, m                    | 99, CH                |
| 2'       | 1.51 (*) - 1.84(*)         | 30.7, CH <sub>2</sub> |
| 3'       | 1.36 (*) - 2.24 (*)        | 26.9, CH <sub>2</sub> |
| 4'       | 2.81, dt (4.8, 10.2)       | 79.0, CH              |
| OMe (4') | 3.38, s                    | 56.7, CH <sub>3</sub> |
| 5'       | 3.29, m                    | 74.5, CH              |
| Me (5')  | 1.26, d (6.6)              | 18.0, CH <sub>3</sub> |

\*signals overlapped; \*\* under H<sub>2</sub>O signal

**Table S3.**  $\alpha$ -770 congeners detected in the extract from *Actinoallomurus* sp. ID145770.

| <b>Congener</b> | <b><math>m/z</math> [M+Na]<sup>+</sup></b> | <b>RT (min)</b> | <b><math>\Delta m/z</math></b> | <b>Molecular formula</b>                           | <b>calc. <math>m/z</math></b> | <b>found <math>m/z</math></b> |
|-----------------|--------------------------------------------|-----------------|--------------------------------|----------------------------------------------------|-------------------------------|-------------------------------|
| $\alpha$ -770 A | 857                                        | 6.9             | ---                            | C <sub>45</sub> H <sub>70</sub> O <sub>14</sub> Na | 857.4658                      | 857.4695                      |
| $\alpha$ -770 B | 871                                        | 7.1             | +14                            | C <sub>46</sub> H <sub>72</sub> O <sub>14</sub> Na | 871.4814                      | 871.4845                      |

**Table S4.** <sup>1</sup>H and <sup>13</sup>C NMR data for α-770 in CDCl<sub>3</sub>.

| Position | δ <sub>H</sub> , (J in Hz)    | δ <sub>C</sub> , type |
|----------|-------------------------------|-----------------------|
| 1        |                               | 180.2, C              |
| 2        | 2.89, m                       | 43.4, CH              |
| Me (2)   | 1.21, d (6.1)                 | 17.4, CH <sub>3</sub> |
| 3        | 5.56, m (10.6,1.4)            | 78.4, CH              |
| 4        | 2.14, m                       | 39, CH                |
| Me (4)   | 1.22 (*)                      | 11.6, CH <sub>3</sub> |
| 5        | 4.19, d (4.1)                 | 67, CH                |
| 6        | 2.56, m                       | 29.4, CH              |
| Me (6)   | 0.96 (*)                      | 10.7, CH <sub>3</sub> |
| 7        | 3.29 (*)                      | 82.2, CH              |
| OMe (7)  | 3.56, s                       | 58.9, CH <sub>3</sub> |
| 8        | 1.77 (*) – 1.97 (*)           | 33.7, CH <sub>2</sub> |
| 9        |                               | 104.5, C              |
| 10       | 1.63 (*) – 2.41dd (12.6, 7.7) | 45.9, CH <sub>2</sub> |
| 11       | 3.96, m                       | 87.5, CH              |
| OMe (11) | 3.29, s                       | 58.4, CH <sub>3</sub> |
| 12       |                               | 77.5, C               |
| Me (12)  | 1.70, s                       | 27.8, CH <sub>3</sub> |
| 13       | 3.74, m                       | 77.8, CH              |
| 14       | 1.58 (*) – 1.96 (*)           | 26.5, CH <sub>2</sub> |
| 15       | 1.45 (*) – 2.04 (*)           | 29.8, CH <sub>2</sub> |
| 16       |                               | 82.7, C               |
| Me (16)  | 1.12, s                       | 21.5, CH <sub>3</sub> |
| 17       | 4.18, m                       | 85.1, CH              |
| 18       | 2.34, m                       | 35.1, CH              |
| Me (18)  | 0.92 (*)                      | 15.2, CH <sub>3</sub> |
| 19       | 1.60 (*) – 2.16 (*)           | 35.1, CH <sub>2</sub> |
| 20       | 4.28, m                       | 78.1, CH              |
| 21       |                               | 106.4, C              |
| 22       | 1.92 (*)                      | 38.9, CH              |
| Me (22)  | 0.97 (*)                      | 13.2, CH <sub>3</sub> |
| 23       | 1.54 (*) – 1.97 (*)           | 35.3, CH <sub>2</sub> |
| 24       |                               | 86.7, C               |
| Me (24)  | 1.19, s                       | 24.9, CH <sub>3</sub> |
| 25       | 3.57 (*)                      | 74.9, CH              |
| 26       | 1.09 (*) – 1.39 (*)           | 26.2, CH <sub>2</sub> |
| 27       | 0.93 (*)                      | 10.6, CH <sub>3</sub> |
| 1'       |                               | 171.4, C              |
| 2'       |                               | 112.4, C              |
| 3'       |                               | 163.1, C              |
| 4'       | 6.85, d (8)                   | 115.7, CH             |
| 5'       | 7.27, (*)                     | 133.8, CH             |
| 6'       | 6.72, d (7.5)                 | 122.7, CH             |

\*signals overlapped

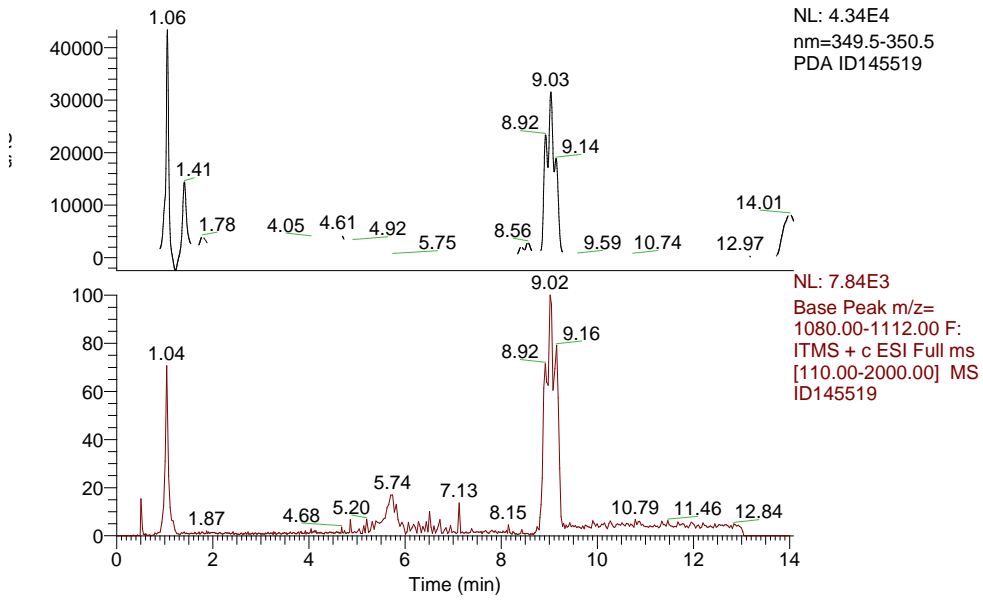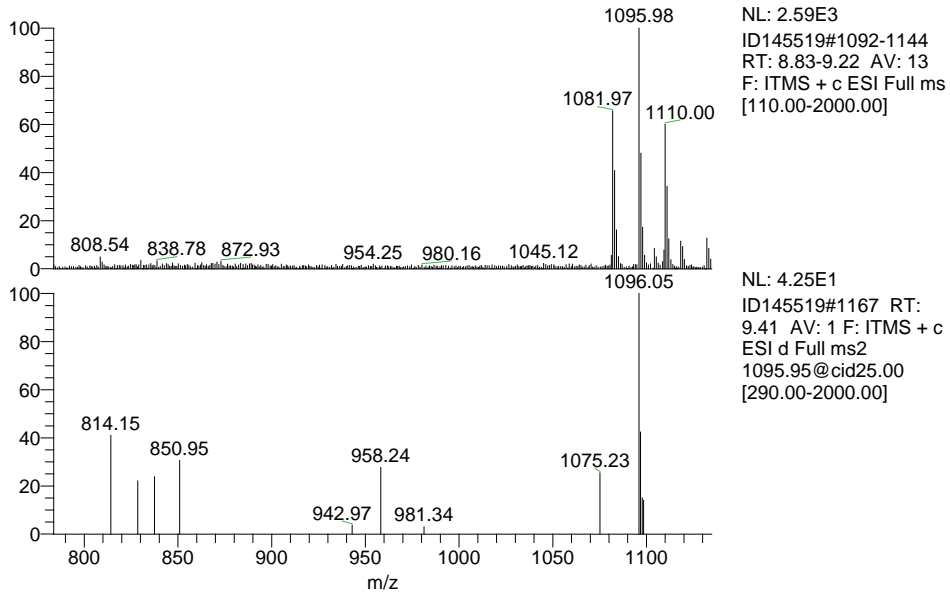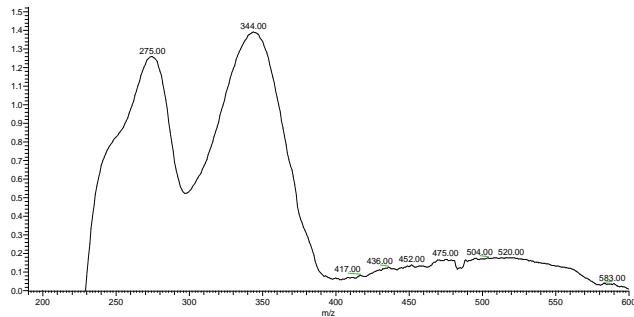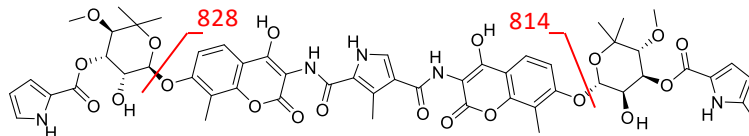

Coumermycin D1

**Figure S1.** Ethyl acetate extract of *Actinoallomurus* sp. ID145519. From top to bottom: UV chromatogram at 350 nm; extracted ion chromatogram of  $m/z$   $[M+H]^+$  in the 1080–1110 range; mass spectrum of peaks at 8.8–9.2 min, with  $m/z$   $[M+H]^+$  1082, 1096 and 1110, corresponding to coumermycin A2, D1 and A1, respectively; MS<sup>2</sup> analysis of  $m/z$   $[M+H]^+$  1096; and UV spectrum of peak at 8.9 min. The putative fragmentation pathway for coumermycin D1 is shown at the very bottom.

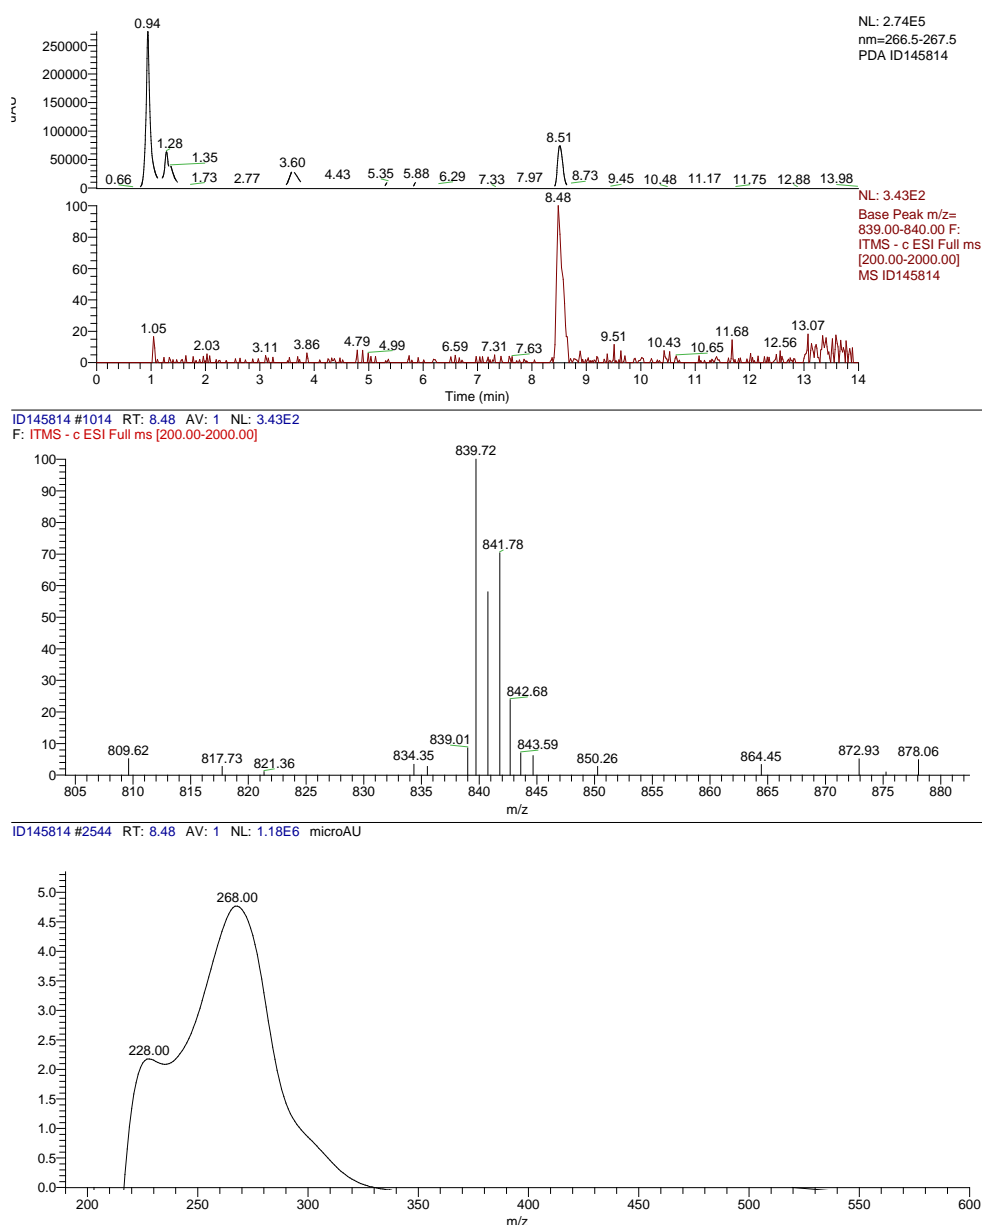

**Figure S2.** Ethyl acetate extract of *Actinoallomurus* sp. ID145814. From top to bottom: UV chromatogram at 267 nm; extracted ion chromatogram of  $m/z$  839 [M-H]; MS analysis of peak at 8.5 min corresponding to the pyrrolosporin-like molecule (pyrrolosporin A  $m/z$  839 [M-H]); UV spectrum of peak at 8.5 min. The isotopic pattern is compatible with a bis-chlorinated compound and the UV spectrum is identical to that reported in literature for pyrrolosporin A. Note that under our experimental conditions we observed no fragmentation of the 8.5-min peak.

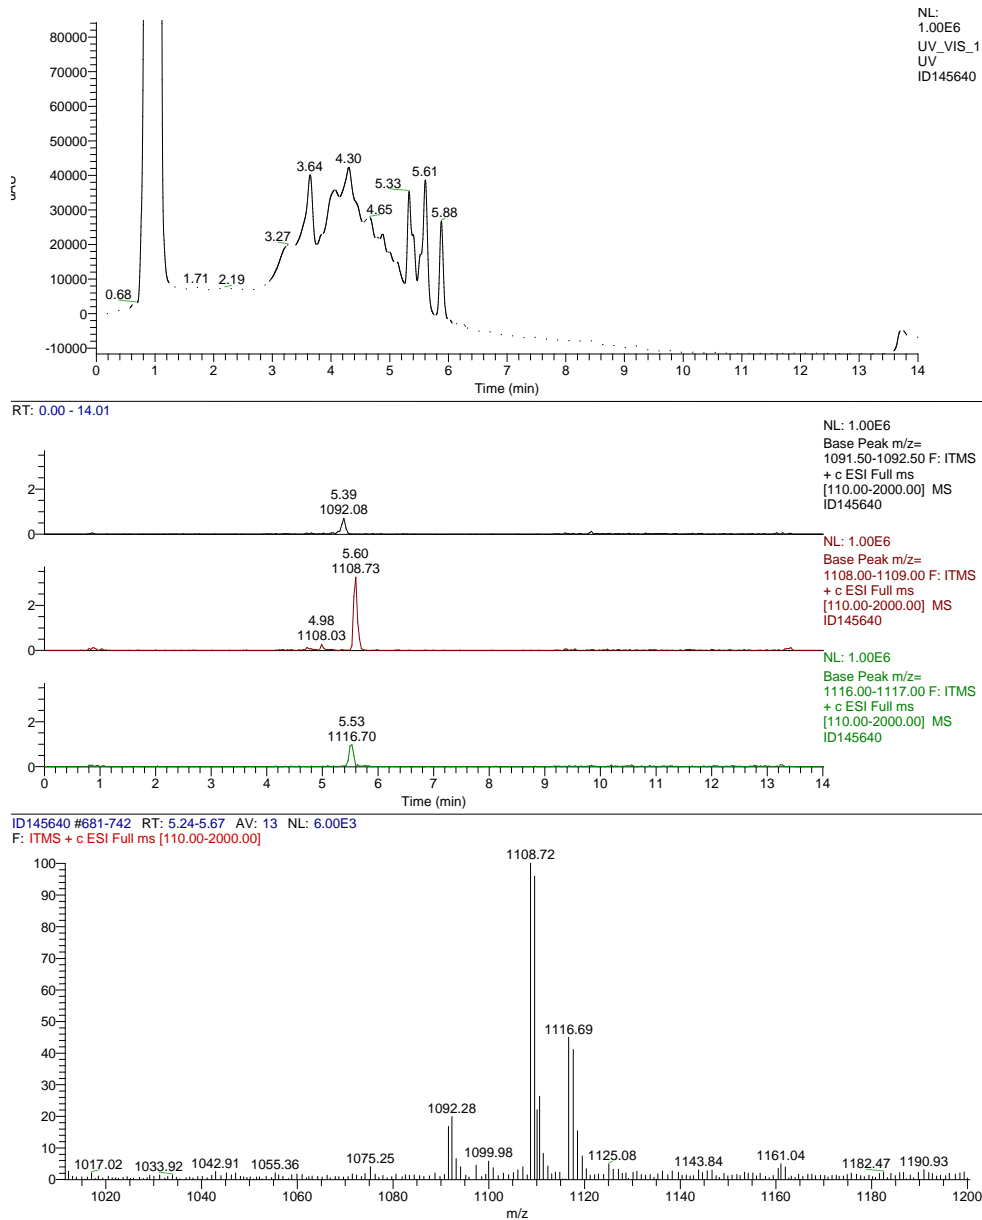

**Figure S3.** Mycelium extract of *Actinoallomurus* sp. ID145640. From top to bottom: UV chromatogram at 230 nm; extracted ion chromatograms of  $m/z$   $[M+2H]^{2+}$  1092, 1108.5 and 1116.5; mass spectrum of peaks at 5.2-5.7 min, with  $m/z$   $[M+2H]^{2+}$  1092, 1108.5 and 1116.5, corresponding to NAI-107 F0 (5.4 min), F2 (4.9 min), A0 (5.6 min) and A2 (5.5 min), respectively.



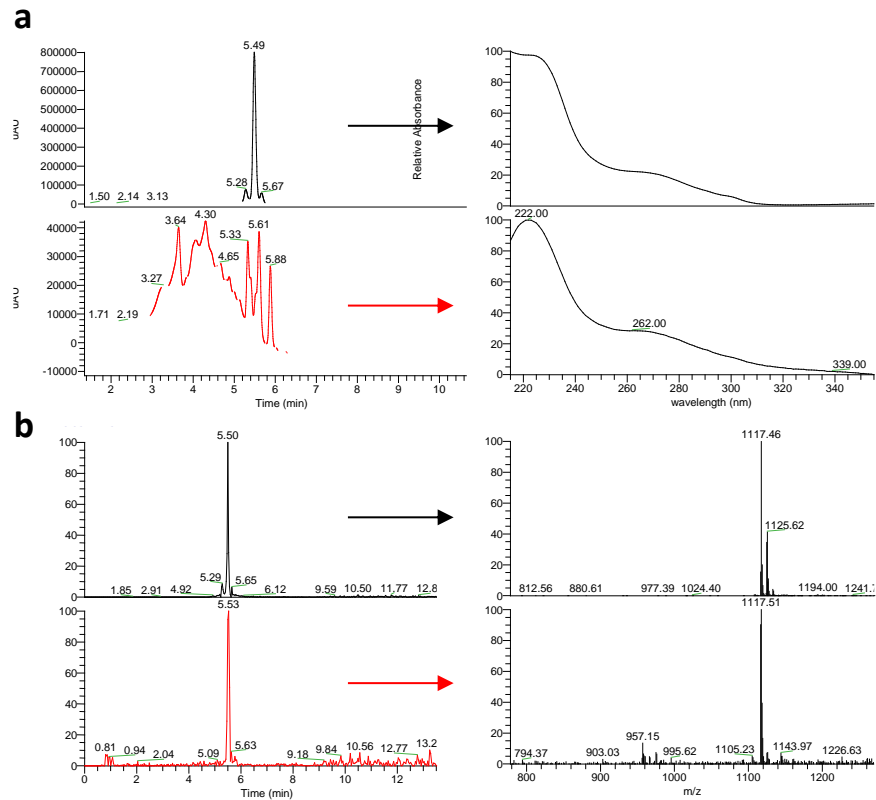

**Figure S4.** Comparison between LC-MS analyses of NAI-107 standard (black lines) and the mycelium extract of *Actinoallomurus* sp. ID145640 (red lines). Panel a: UV chromatogram at 230 nm with the respective total UV spectra at 5.5 min. Panel b: extracted ion chromatograms of  $m/z$   $[M+2H]^{2+}$  1116.5 with the respective MS analysis at 5.5 min, corresponding to NAI-107 A2 representing the main congener present in the purified standard.

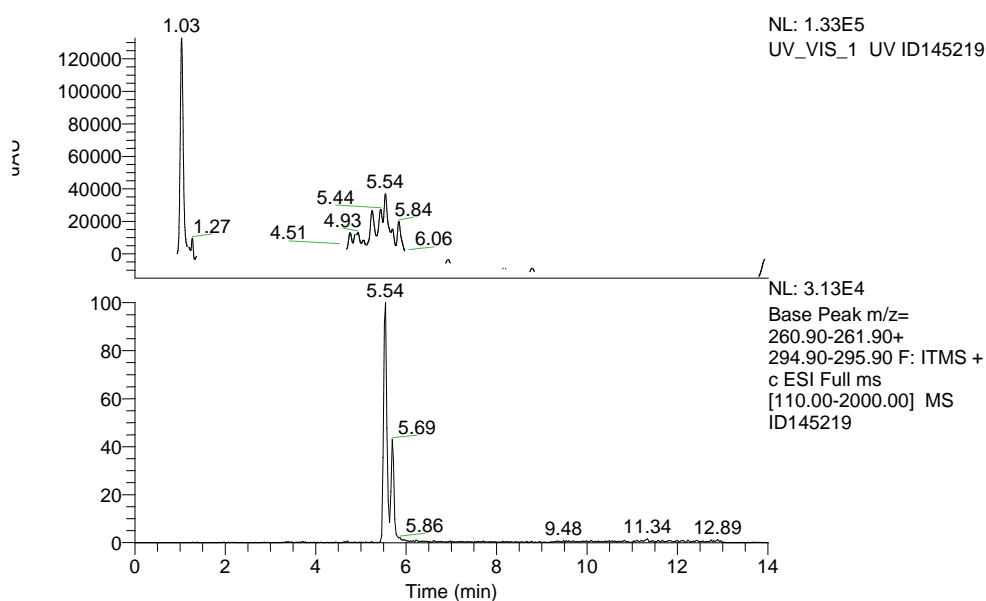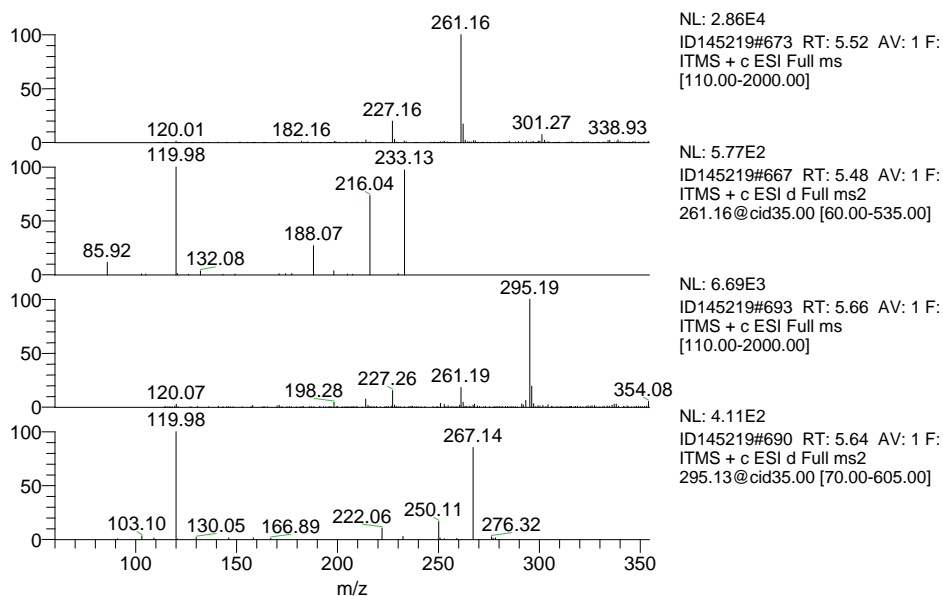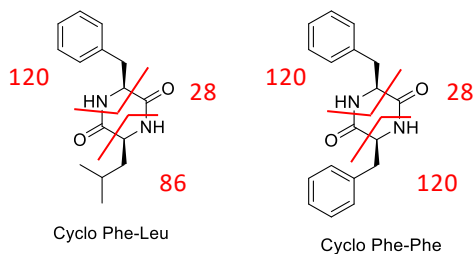

**Figure S5.** Ethyl acetate extract of *Actinoallomurus* sp. ID145219. From top to bottom: UV chromatogram at 230 nm; extracted ion chromatogram of  $m/z$   $[M+H]^+$  261 and 295; MS analysis of peak at 5.5 min, along with its MS<sup>2</sup> data, corresponding to cycloPhe-Leu; and MS analysis of peak at 5.7 min, along with its MS<sup>2</sup> data, corresponding to cycloPhe-Phe. Putative fragmentation pathways for cycloPhe-Leu and cycloPhe-Phe are shown at the bottom.

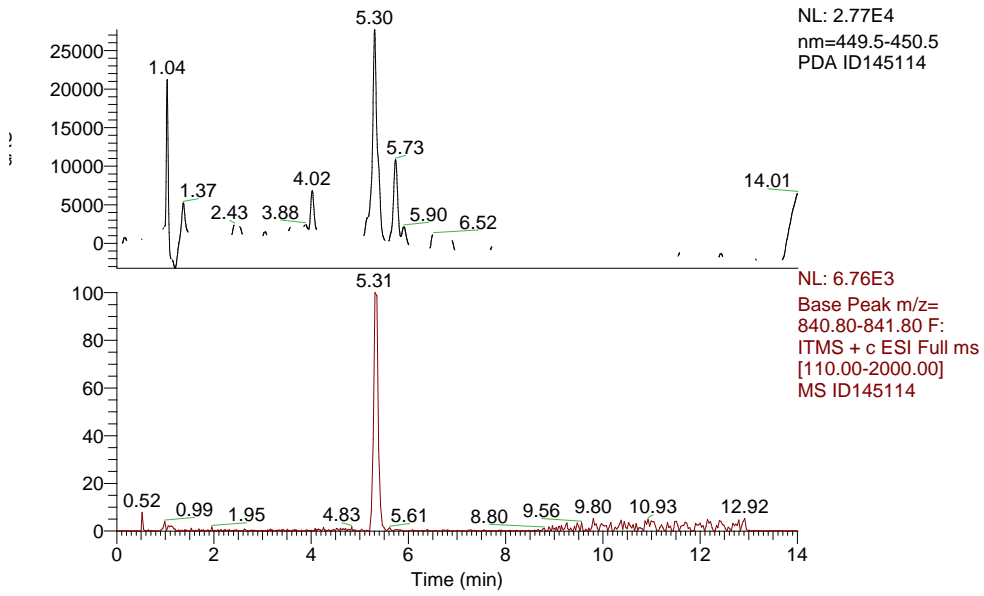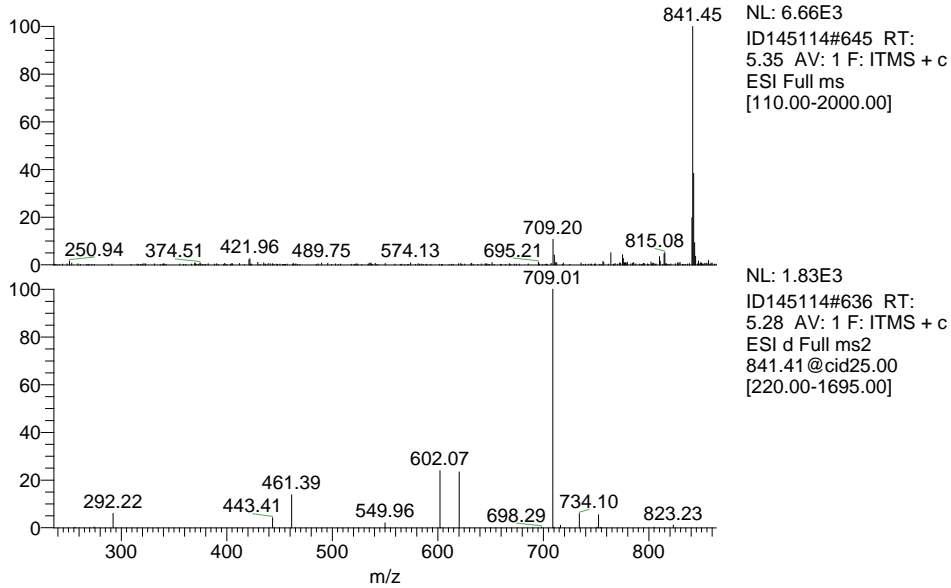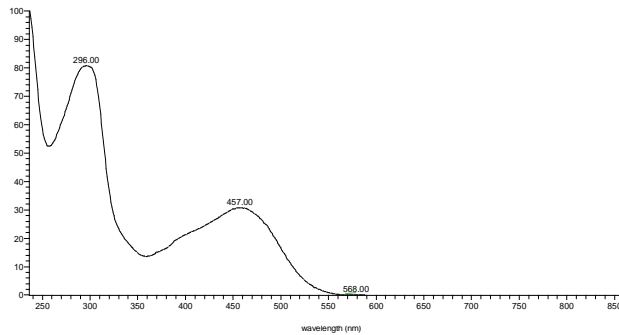

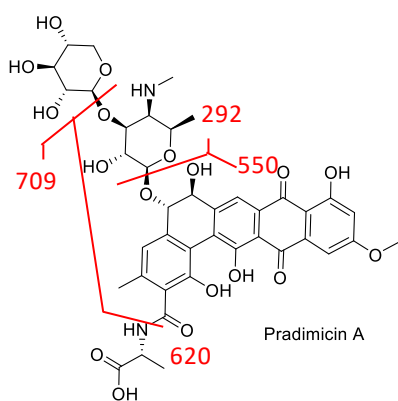

**Figure S6.** Ethyl acetate extract of *Actinoallomurus* sp. ID145114. From top to bottom: UV chromatogram at 450 nm; extracted ion chromatogram of  $m/z$   $[M+H]^+$  841; mass spectrum of peak at 5.3 min corresponding to pradimicin ( $m/z$   $[M+H]^+$  841); MS<sup>2</sup> spectrum of  $m/z$   $[M+H]^+$  841; and UV spectrum of peak at 5.3 min. The UV maxima are identical to those reported for pradimicin in acidic conditions (see Ref. 28 in the main text). Putative fragmentation pathway for pradimicin. Benanomycin was de-replicated by comparison with the standard obtained from strain K15 strain, as previously (ref. 12 in the main text).

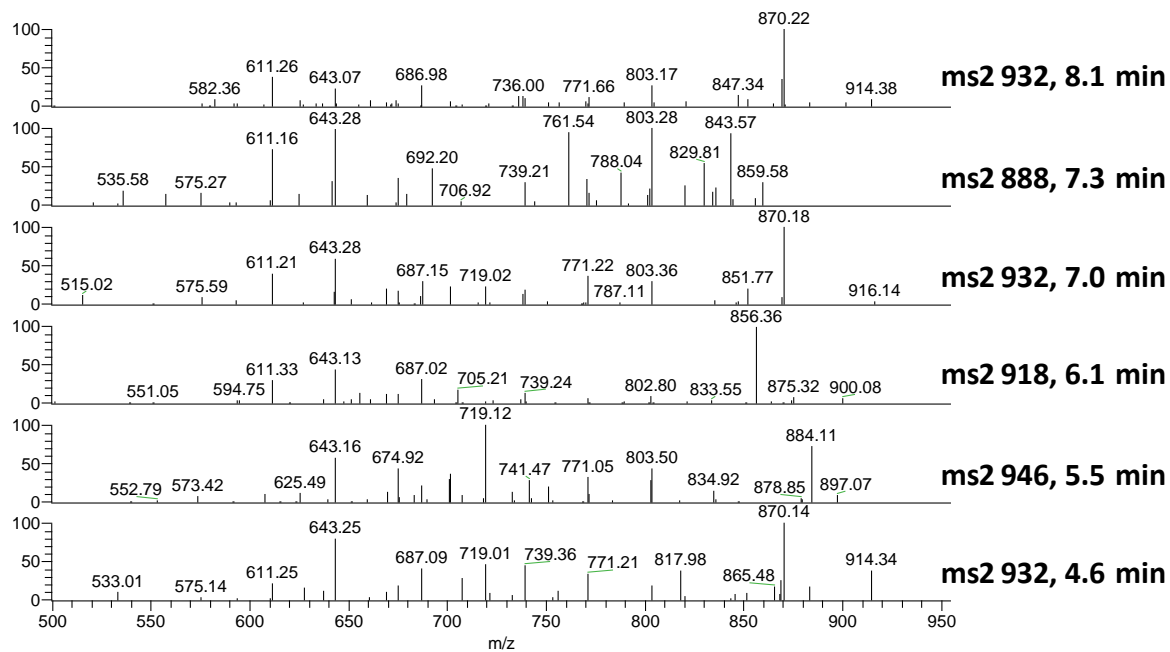

**Figure S7.** Fragmentation patterns of the  $[M+NH_4]^+$  adducts of the six  $\alpha$ -823 congeners (see also Table S2).

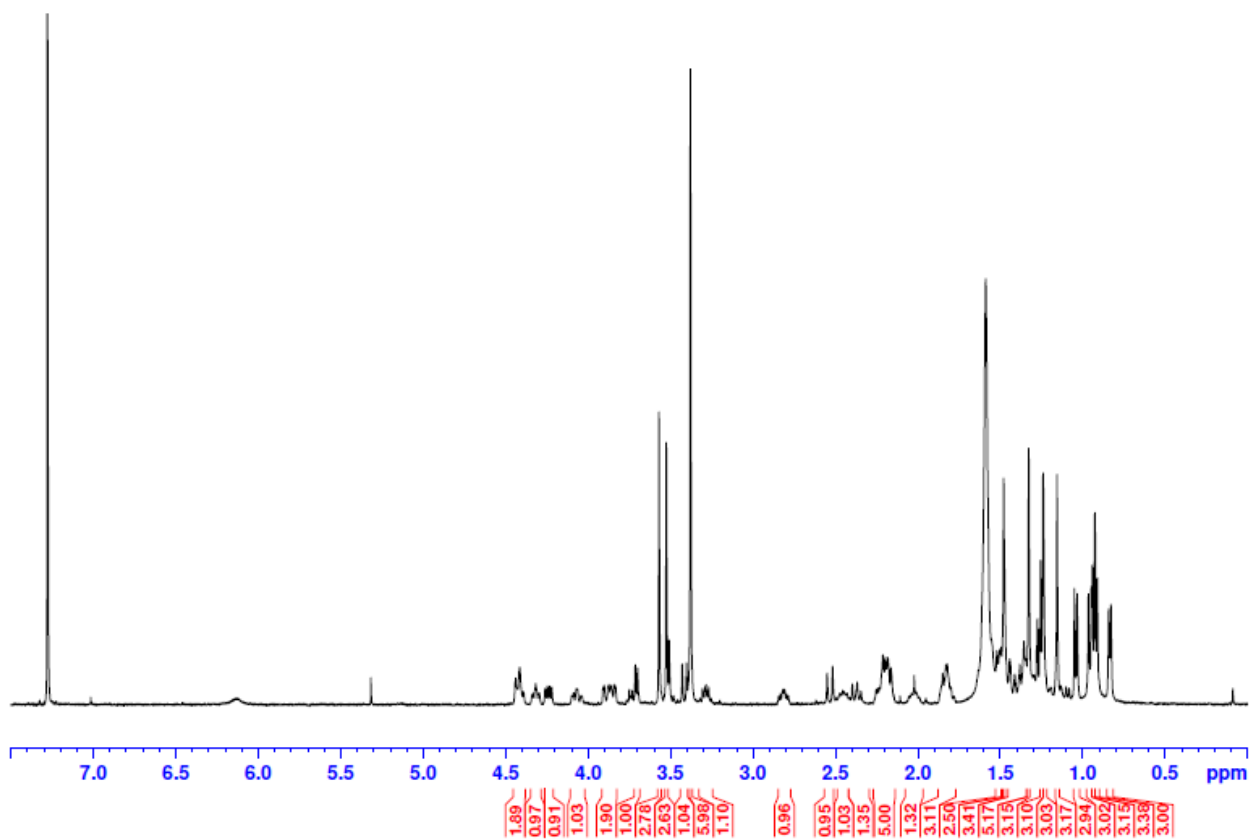

Figure S8. <sup>1</sup>H-NMR (400 MHz, CDCl<sub>3</sub>) spectrum of α-823.

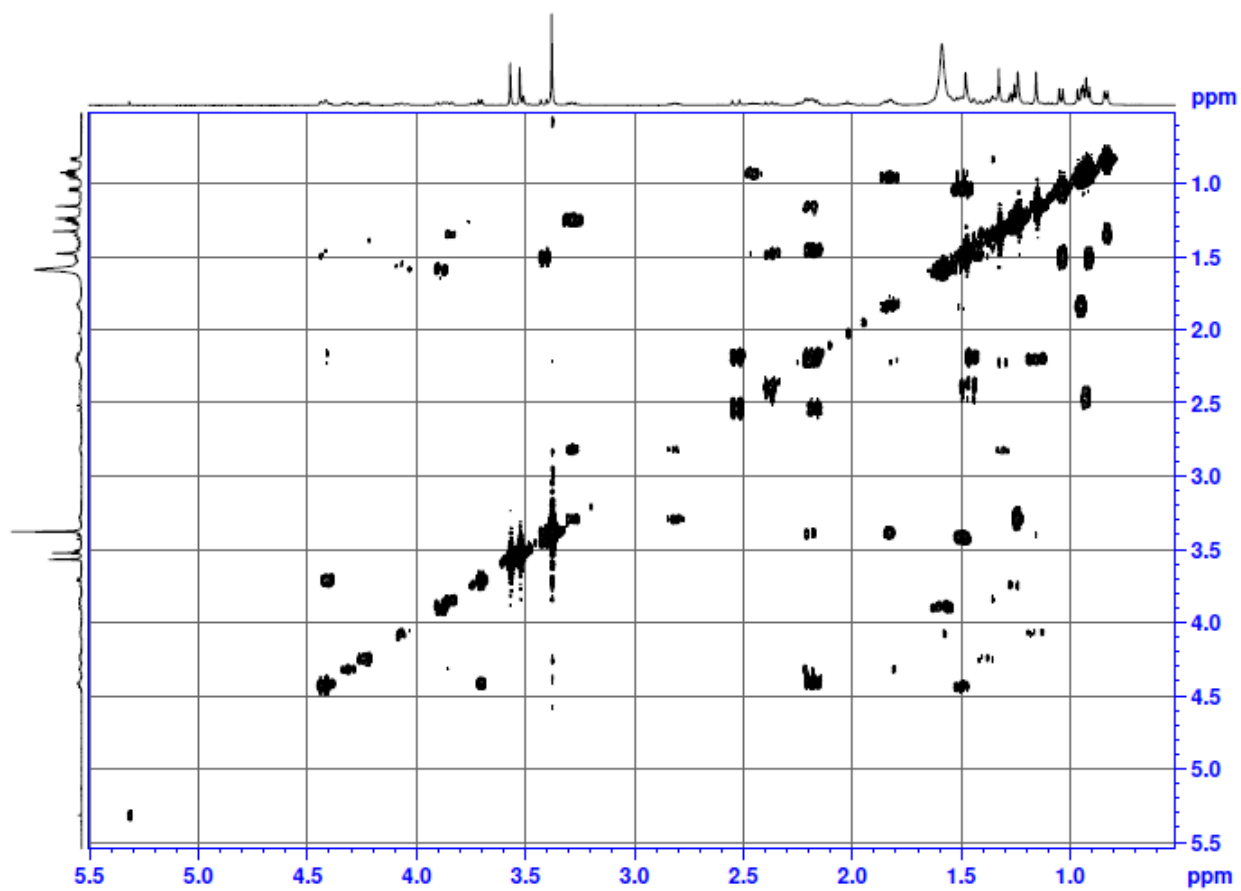

Figure S9. <sup>1</sup>H-COSY NMR (400 MHz, CDCl<sub>3</sub>) spectrum of  $\alpha$ -823.

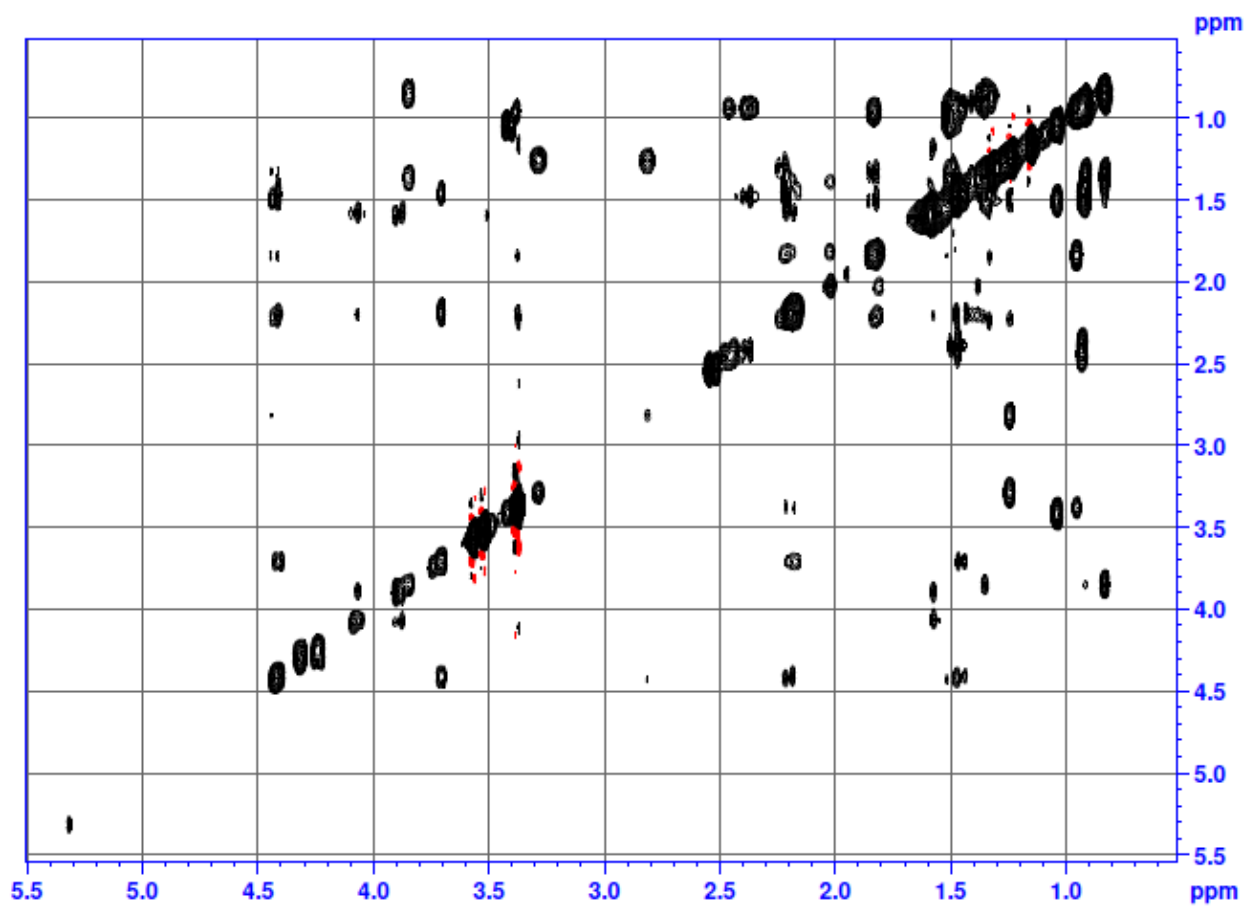

Figure S10.  $^1\text{H}$ -TOCSY NMR (400 MHz,  $\text{CDCl}_3$ ) spectrum of  $\alpha$ -823.



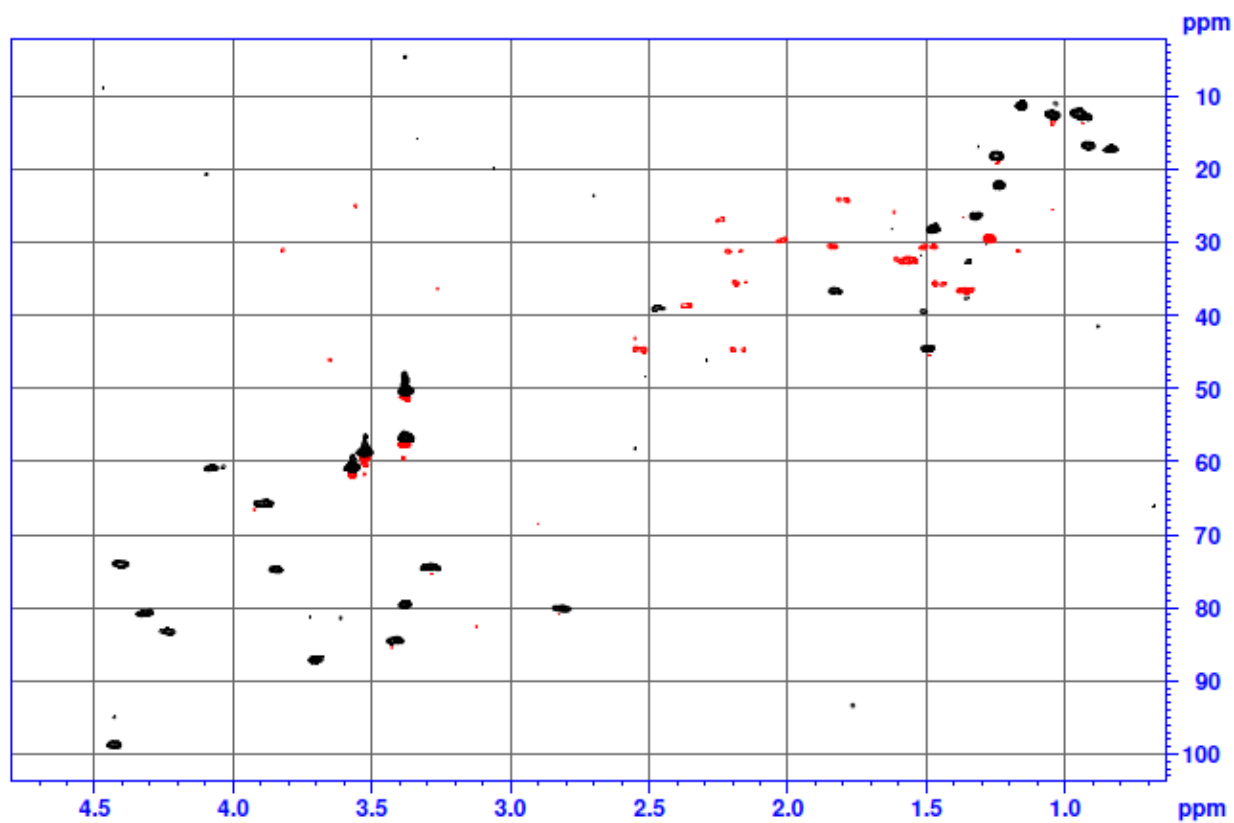

Figure S11.  $^1\text{H}$ - $^{13}\text{C}$  HSQC NMR (400 MHz,  $\text{CDCl}_3$ ) spectrum of  $\alpha$ -823.

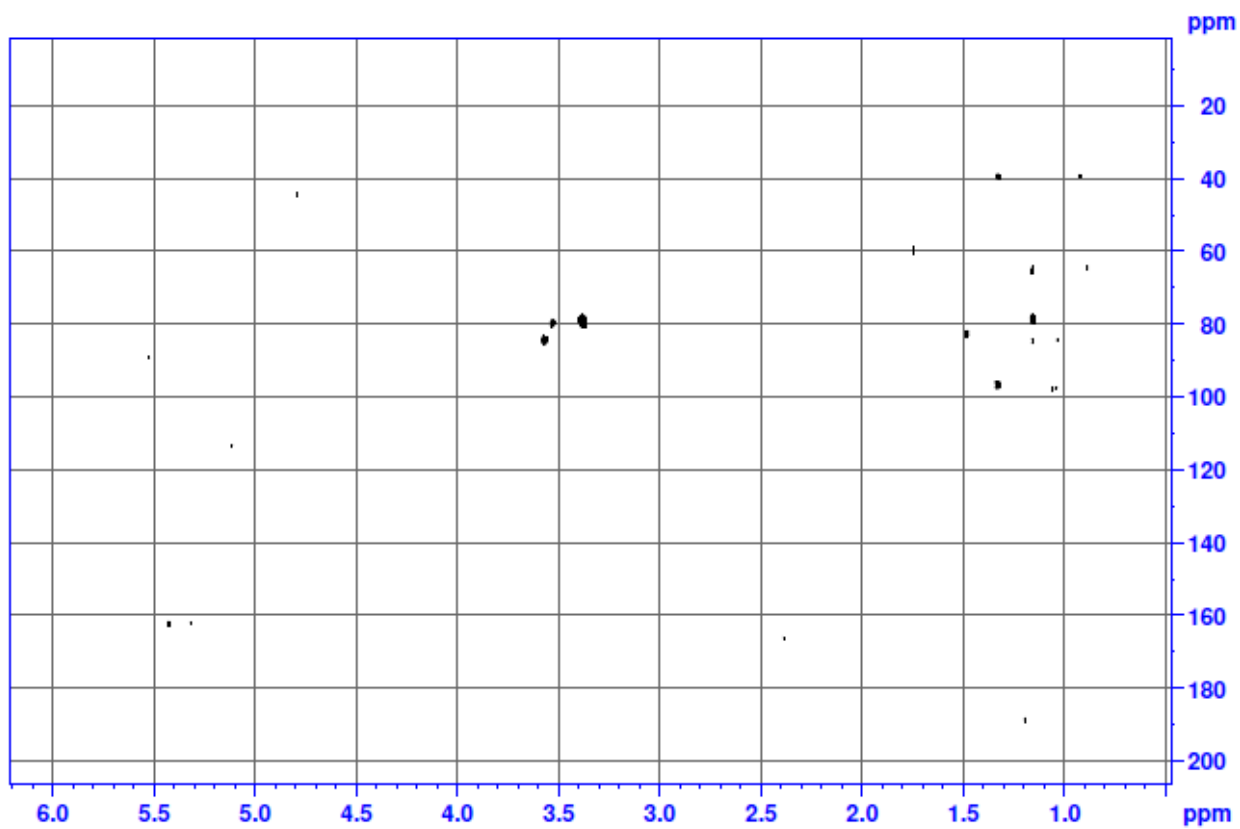

Figure S12.  $^1\text{H}$ - $^{13}\text{C}$  HMBC NMR (400 MHz,  $\text{CDCl}_3$ ) spectrum of  $\alpha$ -823.

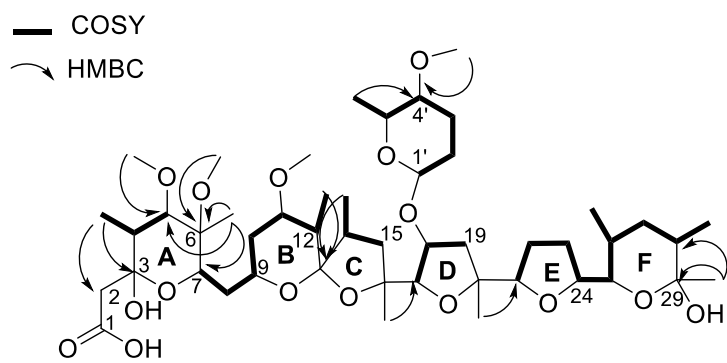

**Figure S13.** Major COSY and HMBC correlations of  $\alpha$ -823.

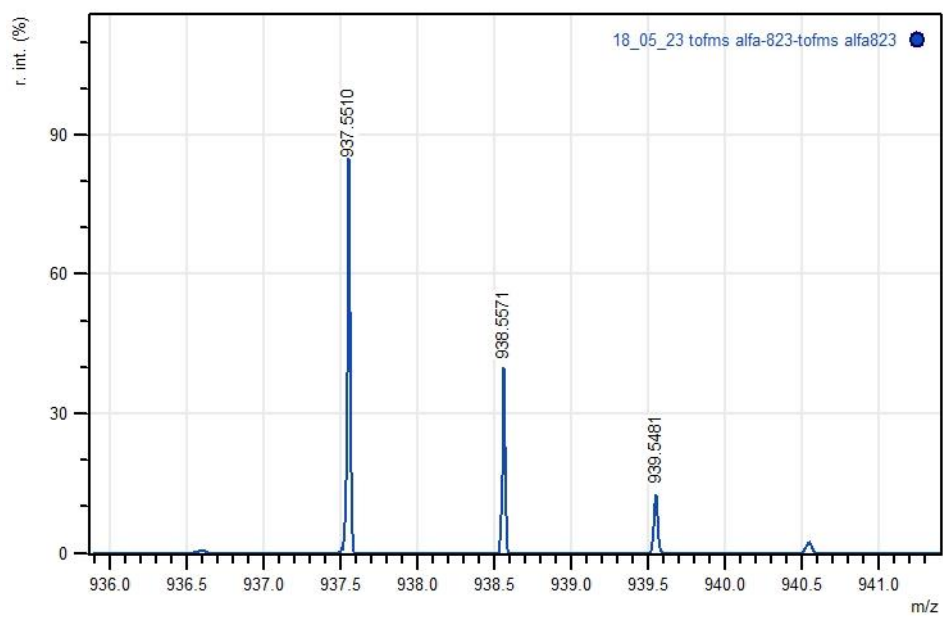

**Figure S14.** High resolution MS spectrum of  $\alpha$ -823.

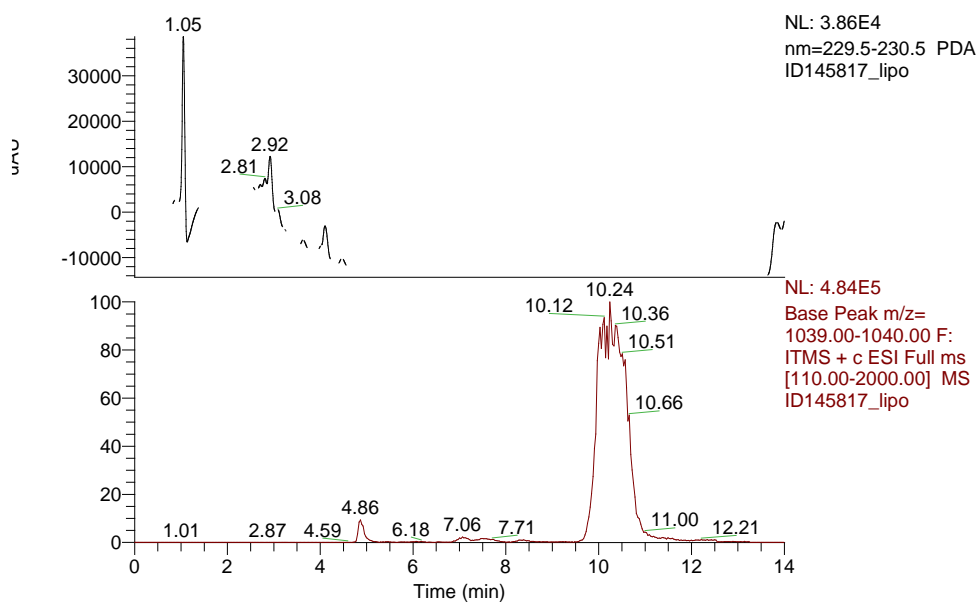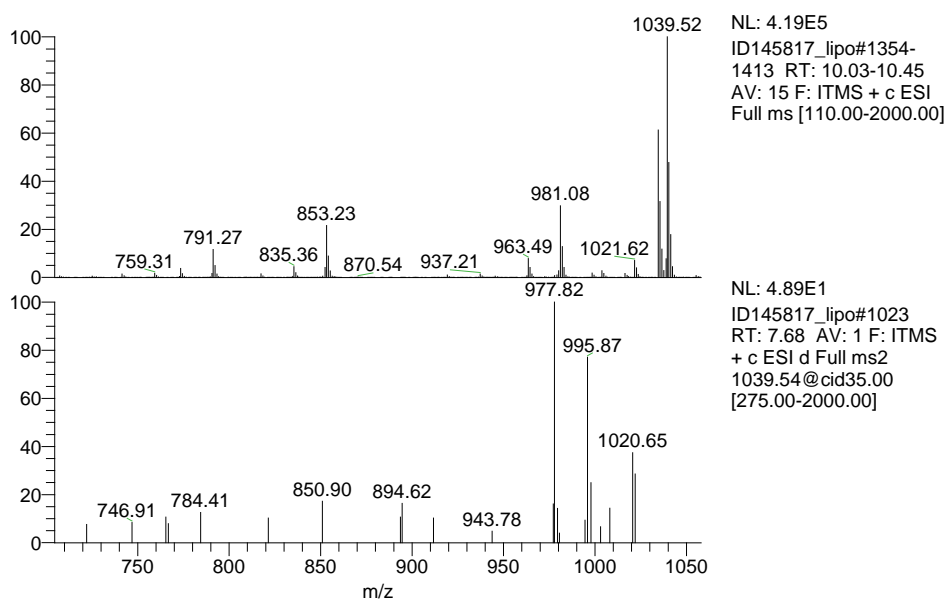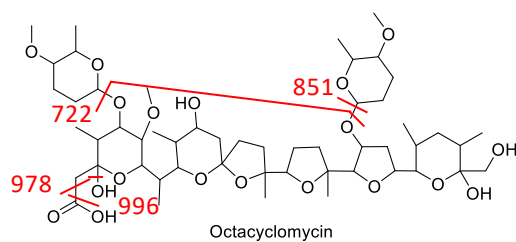

**Figure S15.** Mycelium extract of *Actinoallomurus* sp. ID145817. From top to bottom: UV chromatogram at 230 nm; extracted ion chromatogram of  $m/z$   $[M+Na]^+$  1039; mass spectrum of peak at 10.2 min; and MS<sup>2</sup> analysis of  $m/z$   $[M+Na]^+$  1039, corresponding to octacyclomycin. Putative fragmentation pathway for octacyclomycin is shown at the bottom.

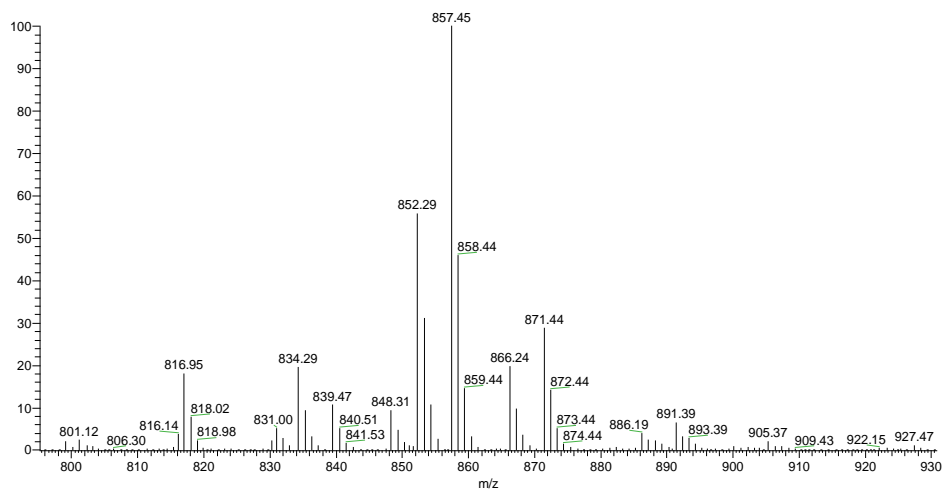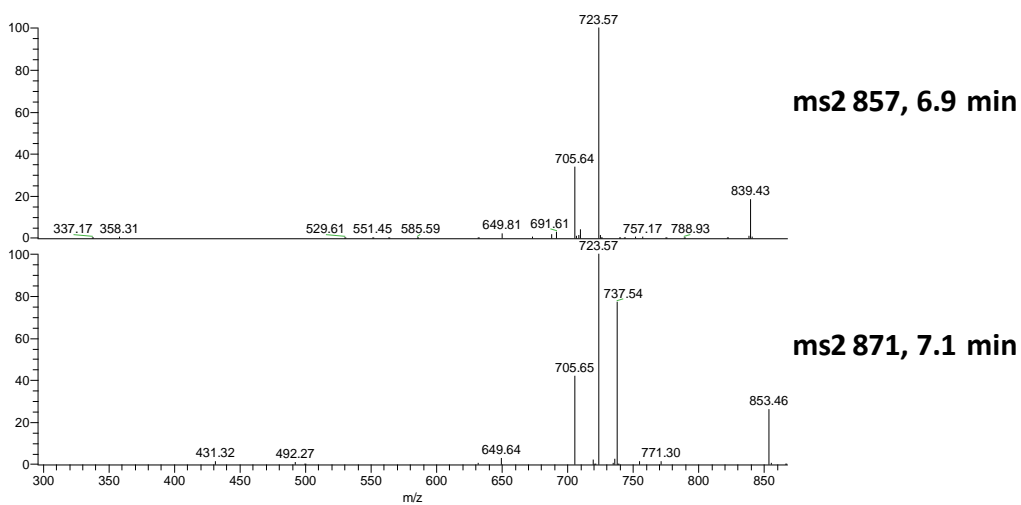

**Figure S16.** Full MS spectrum between 6.5-7.2 min. Fragmentation patterns of the  $[M+NH_4]^+$  adducts of the two  $\alpha$ -770 congeners of (see also Table S3).

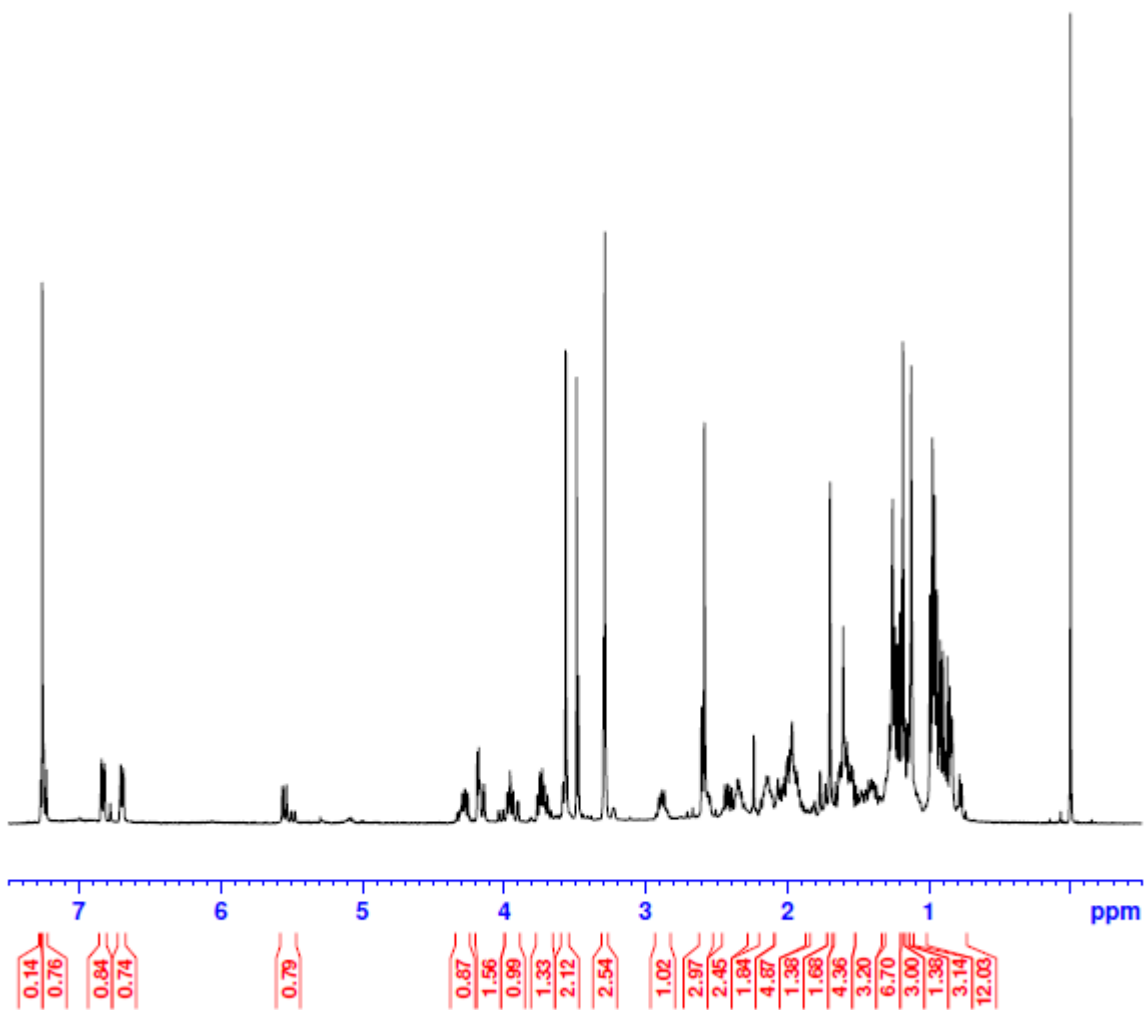

Figure S17. <sup>1</sup>H NMR (400 MHz, CDCl<sub>3</sub>) spectrum of α-770.

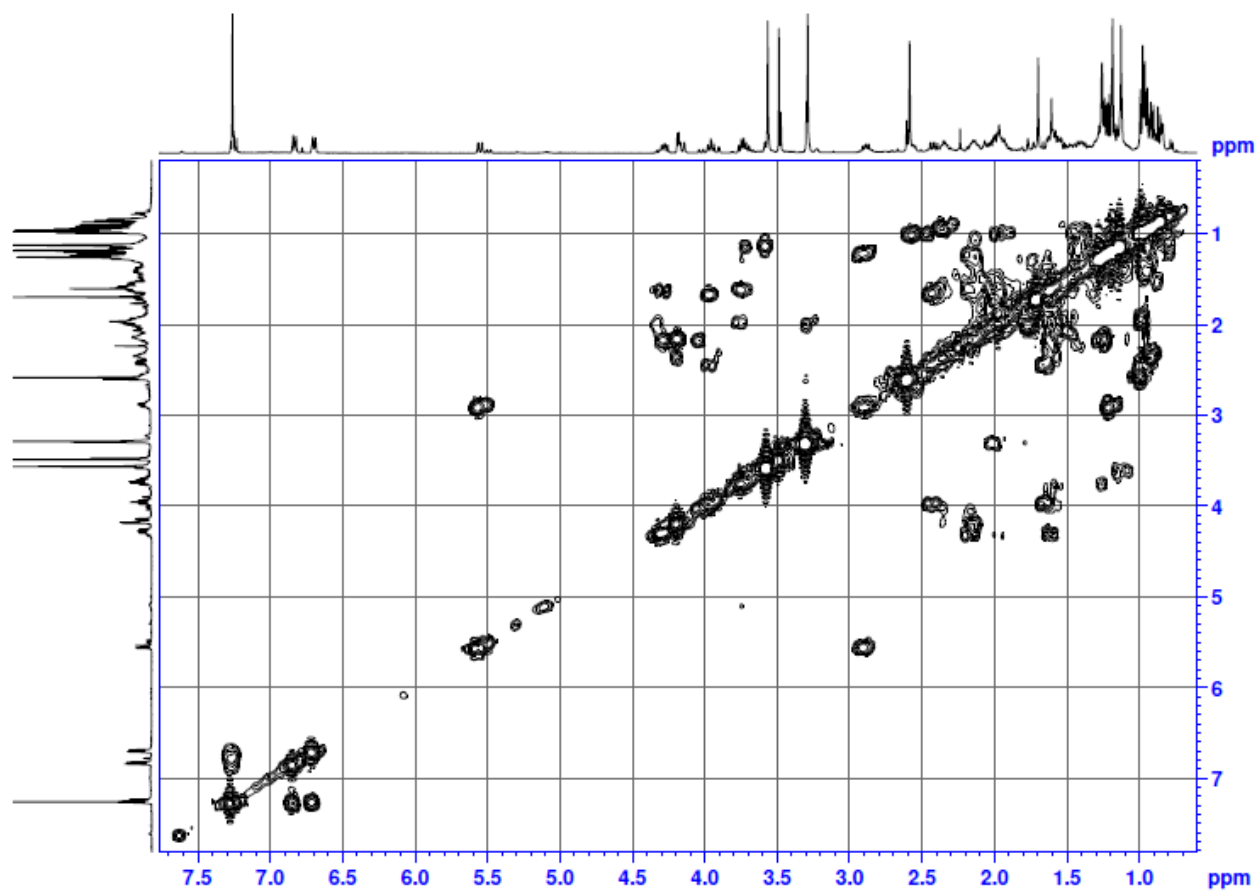

Figure S18. <sup>1</sup>H-COSY NMR (400 MHz, CDCl<sub>3</sub>) spectrum of  $\alpha$ -770

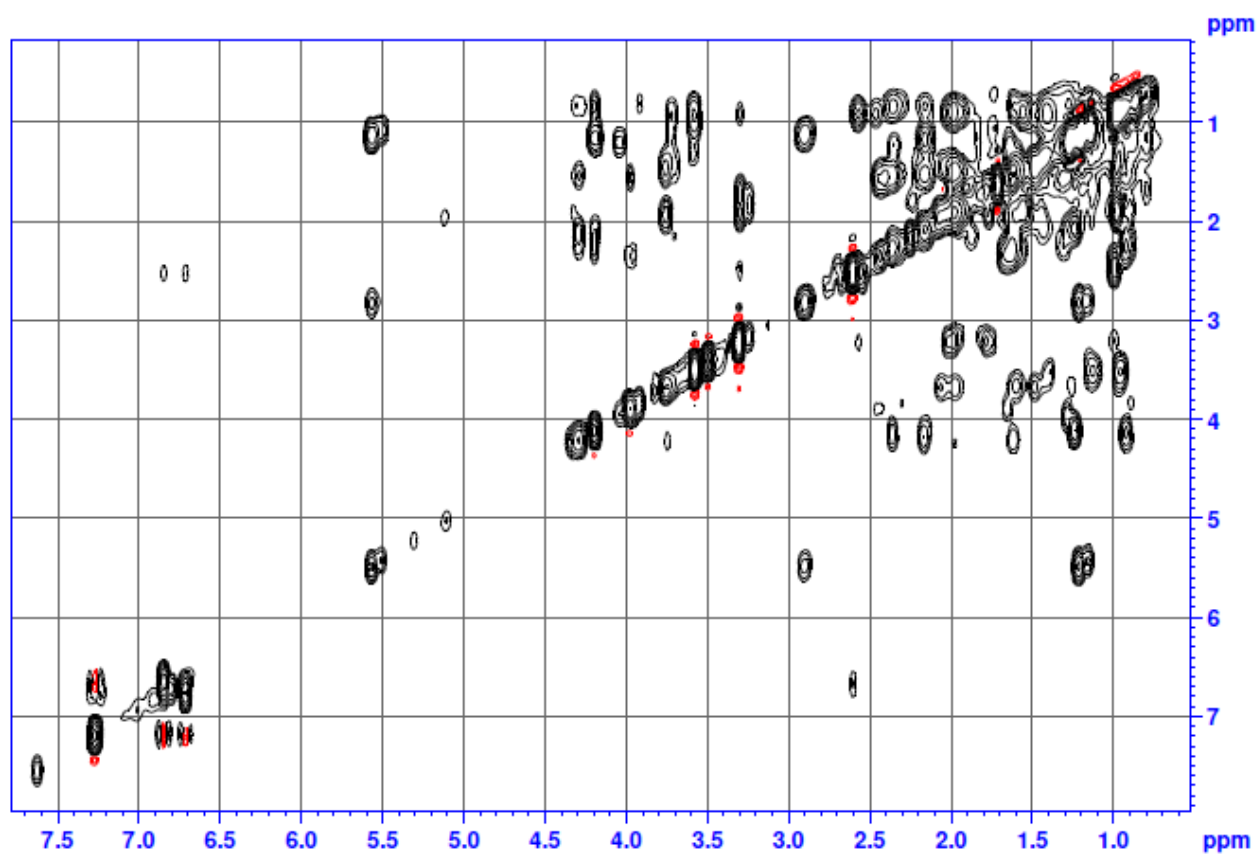

Figure S19.  $^1\text{H}$ -TOCSY NMR (400 MHz,  $\text{CDCl}_3$ ) spectrum of  $\alpha$ -770.



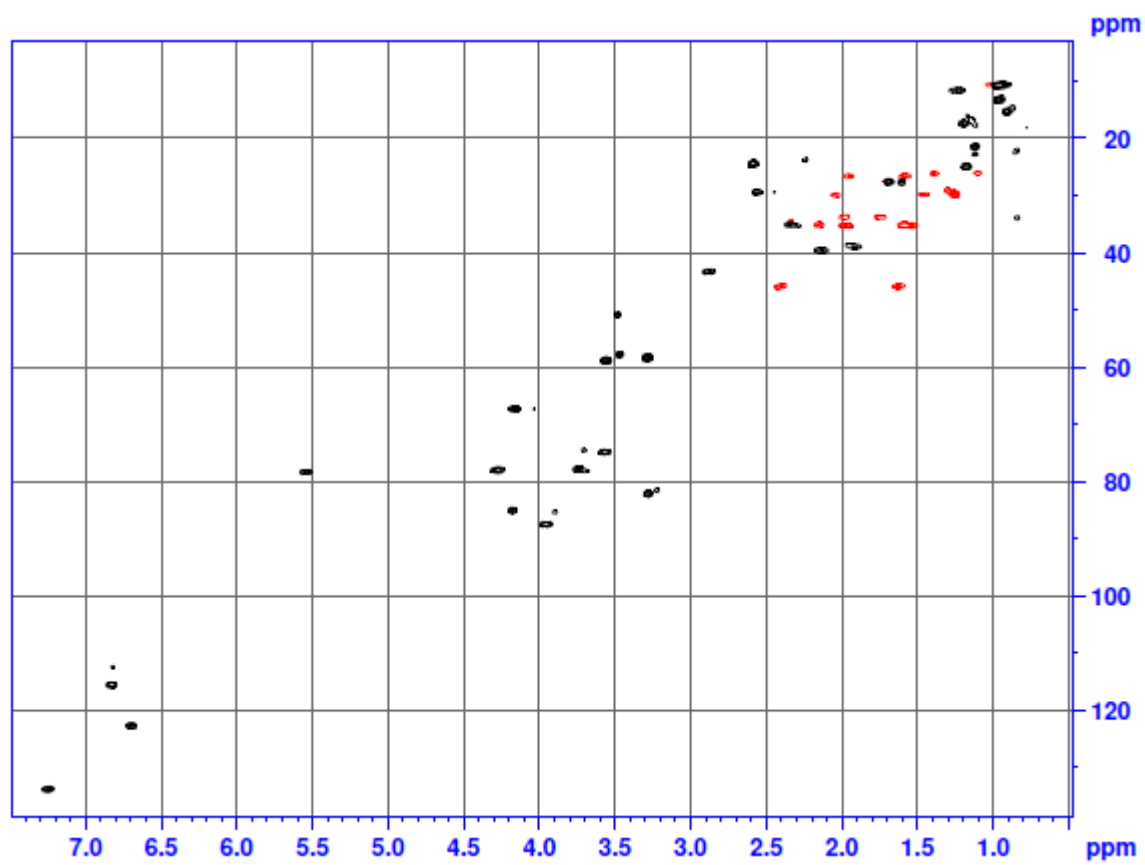

**Figure S20.**  $^1\text{H}$ - $^{13}\text{C}$  HSQC NMR (400 MHz,  $\text{CDCl}_3$ ) spectrum of  $\alpha$ -770.

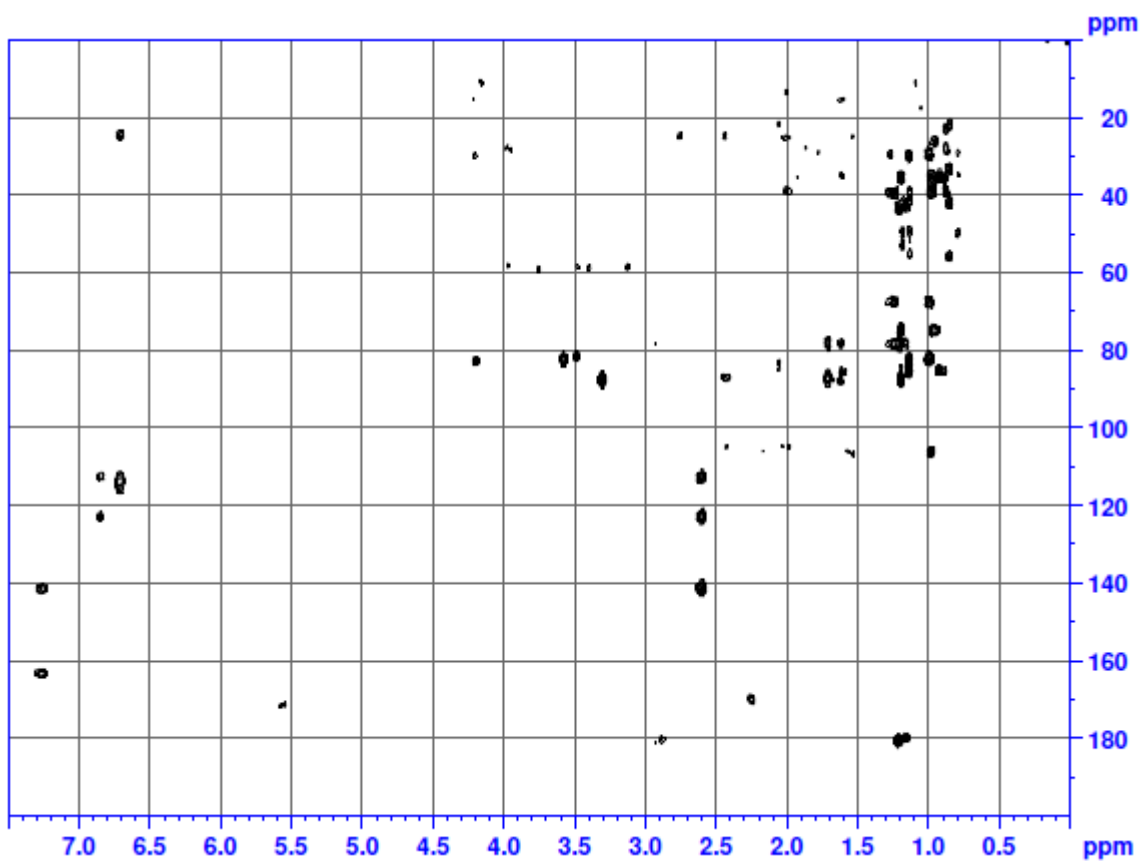

Figure S21.  $^1\text{H}$ - $^{13}\text{C}$  HMBC NMR (400 MHz,  $\text{CDCl}_3$ ) spectrum of  $\alpha$ -770.

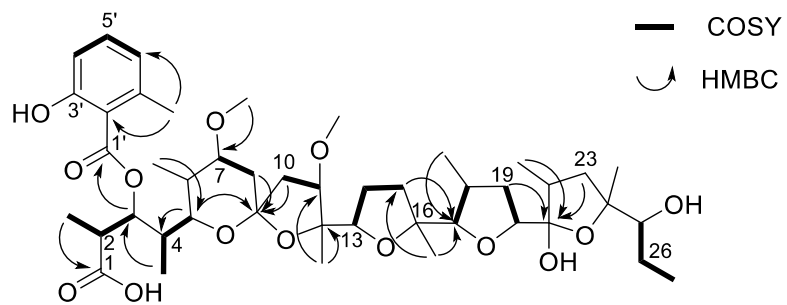

**Figure S22.** Major COSY and HMBC correlations of  $\alpha$ -770.

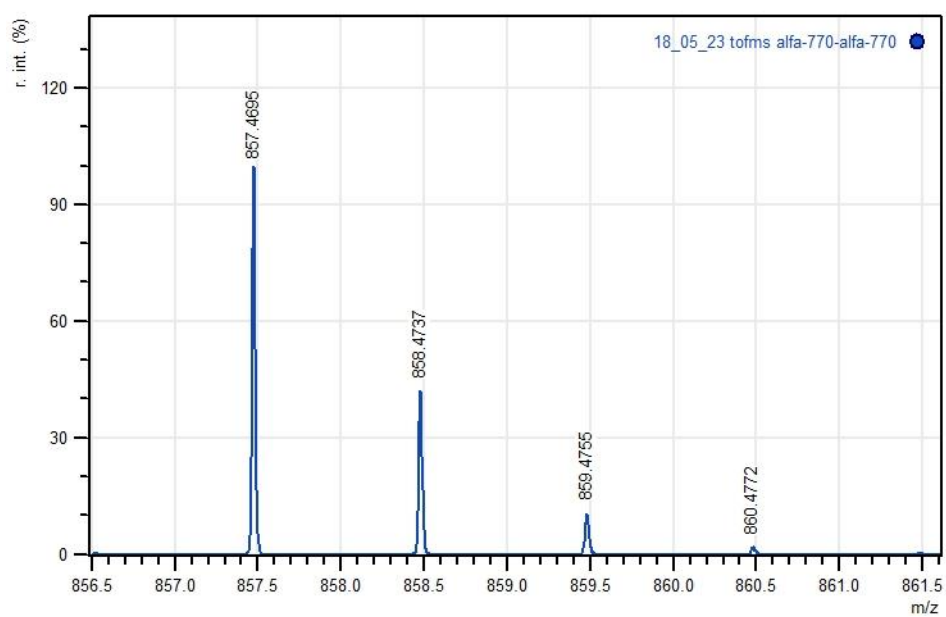

**Figure S23.** High resolution MS spectrum of  $\alpha$ -770.
